# Supplementary material for: N10-C11 Imine is Essential for Gram-negative Antibacterial Activity of Broad Spectrum Pyrrolobenzodiazepines
Source: Preprints.org preprint supplement (doi:10.20944/preprints202211.0296.v1), 2022-11-16
Supplement: Supplementary file 1 [file supplementary]

## Supporting Information

# N10-C11 Imine is essential for Gram-negative antibacterial activity of broad spectrum pyrrolobenzodiazepines

Pietro Picconi<sup>1,2</sup>, Charlotte K. Hind<sup>3</sup>, J. Mark Sutton<sup>3</sup> and Khondaker Miraz Rahman<sup>1\*</sup>

<sup>1</sup> Institute of Pharmaceutical Science, King's College London, London, SE1 9NH, UK.;  
k.miraz.rahman@kcl.ac.uk

<sup>2</sup> Nerviano Medical Sciences Srl, Via Pasteur, Nerviano, IT 20014

<sup>3</sup> UK Health Security Agency, National Infections Service, Porton Down, Salisbury, Wiltshire, SP4 0JG UK.; mark.sutton@ukhsa.gov.uk

\* Correspondence: [k.miraz.rahman@kcl.ac.uk](mailto:k.miraz.rahman@kcl.ac.uk); j.mark.sutton@ukhsa.gov Tel.: (optional; include country code; if there are multiple corresponding authors, add author initials)

\* To whom correspondence should be addressed

<sup>1</sup>Current address: Nerviano Medical Sciences Srl, Via Pasteur, Nerviano, IT 20014

### Purity determination of synthesized final compounds

The level of purity of the compounds for biological testing has been evaluated through LC-MS analysis, using two different gradient methods, reported hereafter. LC-MS analyses were performed on a Waters Alliance 2695 system (from Waters), with elution in gradient. HPLC grade solvents were used as mobile phase while a Monolithic C18 50 X 4.60 mm column (from Phenomenex) was used as stationary phase. UV detection was performed using a Waters 2996 photo array detector (from Waters). Injection volume has been set to 10  $\mu$ L. The compounds have been dissolved in a mixture of H<sub>2</sub>O/ACN (50/50, v/v) or DMSO/ACN (50/50, v/v) accordingly to the solubility. The area of the peak corresponding to the compound has been automatically determined by the software included in the LC-MS system. The eventual presence of solvent UV trace has been subtracted to the total in order to determine the percentage of purity.

#### LC-MS methods:

Method A: flow 0.5 mL/min

A) water + 0.1 % formic acid

B) acetonitrile + 0.1% formic acid

| Time (min) | 0  | 3  | 3.5 | 4.5 | 5  |
|------------|----|----|-----|-----|----|
| A (%)      | 95 | 10 | 5   | 5   | 95 |
| B (%)      | 5  | 90 | 95  | 95  | 5  |

Method B: flow 1 mL/min

A) water + 0.1 % formic acid

B) acetonitrile + 0.1% formic acid

| Time (min) | 0  | 2  | 5  | 6  | 7.5 | 9  | 10 |
|------------|----|----|----|----|-----|----|----|
| A (%)      | 95 | 95 | 50 | 50 | 5   | 95 | 95 |
| B (%)      | 5  | 5  | 50 | 50 | 95  | 5  | 5  |

| Compound | 5 minutes method | 10 minutes method |
|----------|------------------|-------------------|
|----------|------------------|-------------------|

|           | Retention time<br>(min.) | Purity      | Retention time<br>(min.) | Purity      |
|-----------|--------------------------|-------------|--------------------------|-------------|
| <b>7a</b> | 3.12                     | $\geq 98\%$ | 5.95                     | $\geq 98\%$ |
| <b>8a</b> | 3.30                     | $\geq 98\%$ | 6.40                     | $\geq 98\%$ |

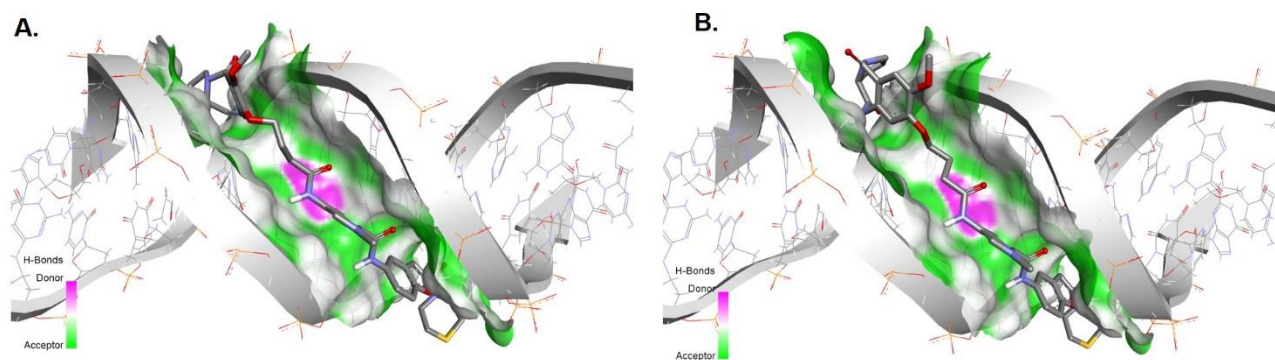

**Figure S1:** DNA binding of compounds 7 (A) and 7a (B) within the DNA minor groove of Sequence-2.
